# Supplementary material
Source: Elsevier journal article supplement (https://rcastoragev2.blob.core.windows.net/e2c0bf0a0d6edc93b55ca3285c33f543/mmc3.pdf)
Supplement: mmc3 [file mmc3.pdf]

### Supplementary Table 3. Related to Figure 3.

#### Cufflinks predicted exonic bins\*

\*Cufflinks prediction was flattened from gtf to gff for HTseqcounts.py

exonic bins of min 5nt length, min 6 reads coverage

referenced to UCSC

|                                                                           | total                                                                                                  | truly novel exons | LINE-derived |
|---------------------------------------------------------------------------|--------------------------------------------------------------------------------------------------------|-------------------|--------------|
| exonic bins                                                               | 183,361                                                                                                | 32,737            | 3,811        |
| # of genes                                                                | 9,958                                                                                                  | 7,604             | 2,241        |
| with min 15% inclusion in control or MATR3/PTBP1 depleted cells (Whippet) |                                                                                                        |                   |              |
| exonic bins                                                               | 149,718                                                                                                | 26,717            | 1,702        |
| # of genes                                                                | 9,957                                                                                                  | 7,298             | 1,085        |
| LINE-derived exons<br>total: 1,702                                        | <div> <div>“cryptic exons”</div> <div> <div>partial-overlap</div> <div>truly novel</div> </div> </div> |                   |              |
| UCSC annotation:                                                          | constitutive                                                                                           | alternative       |              |
|                                                                           | 211                                                                                                    | 311               | 875 305      |
